# Supplementary material
Source: PubMed Central journal article supplement (PMC3272105)
Supplement: NIHMS349170-supplement-1_si_001.pdf [file NIHMS349170-supplement-1_si_001.pdf]

649.8<sup>2+</sup>

YGYMFYPDSR

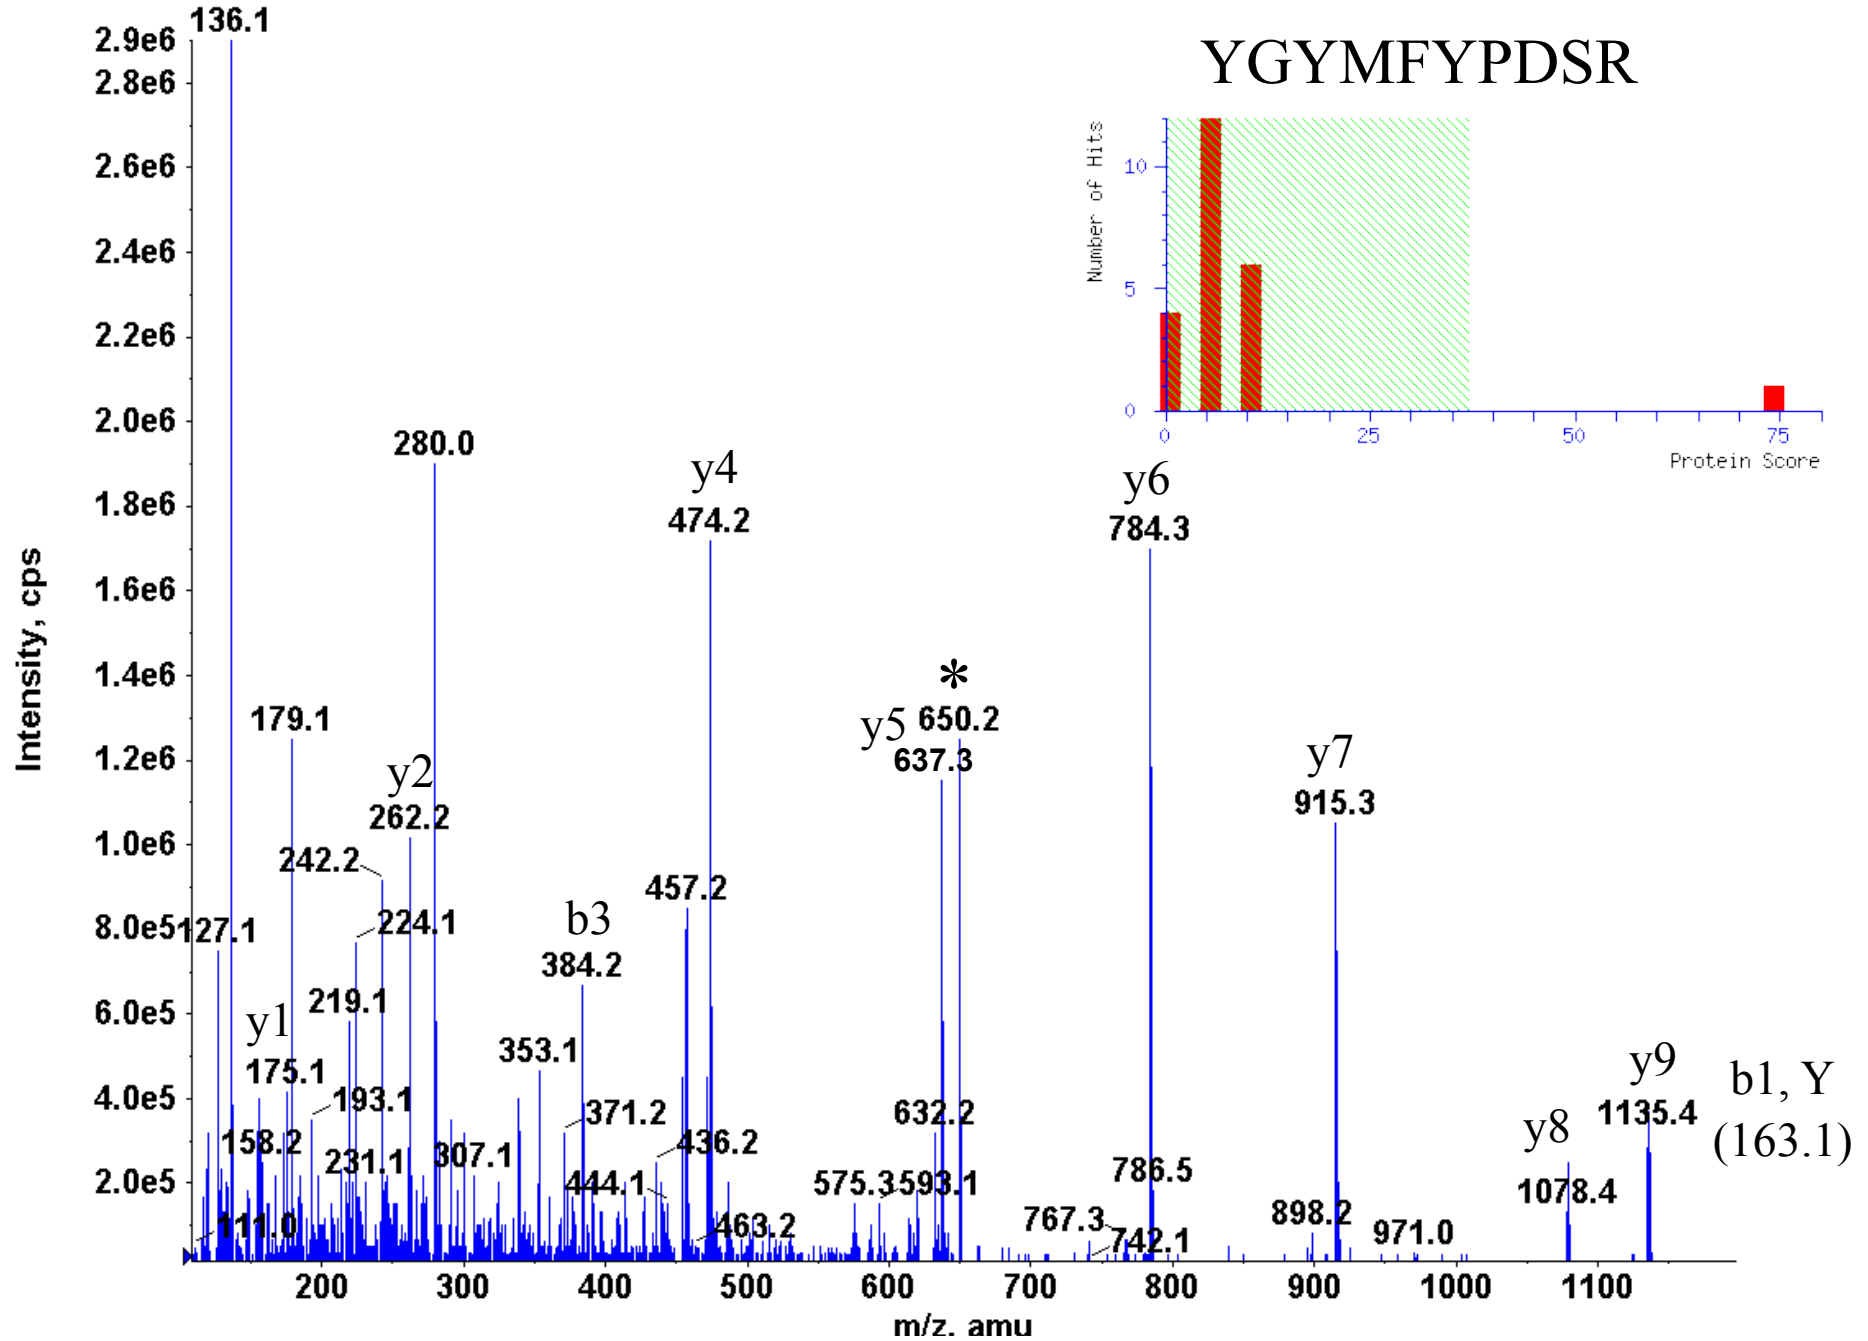

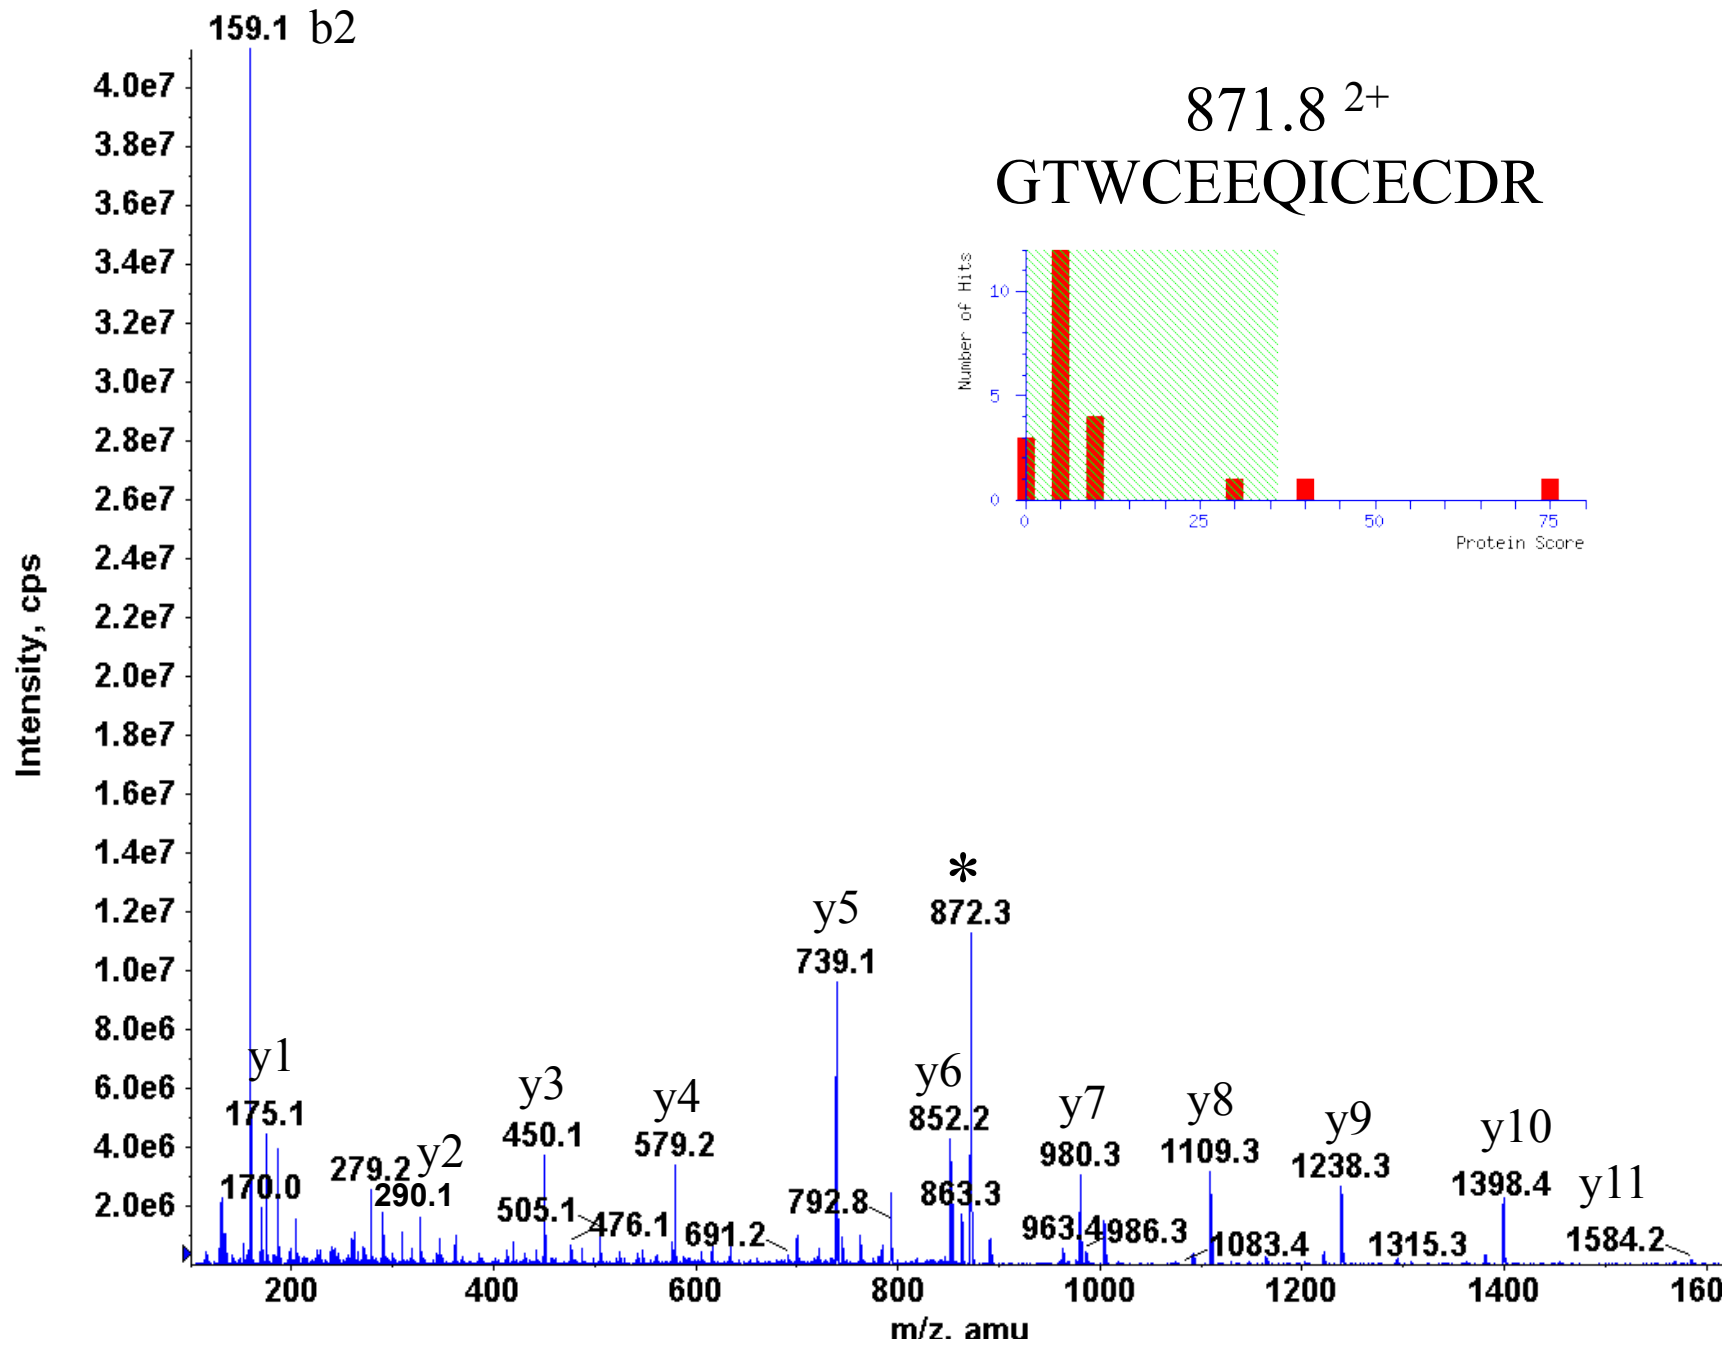

692.3 <sup>2+</sup>  
ZAMPFMEVYER

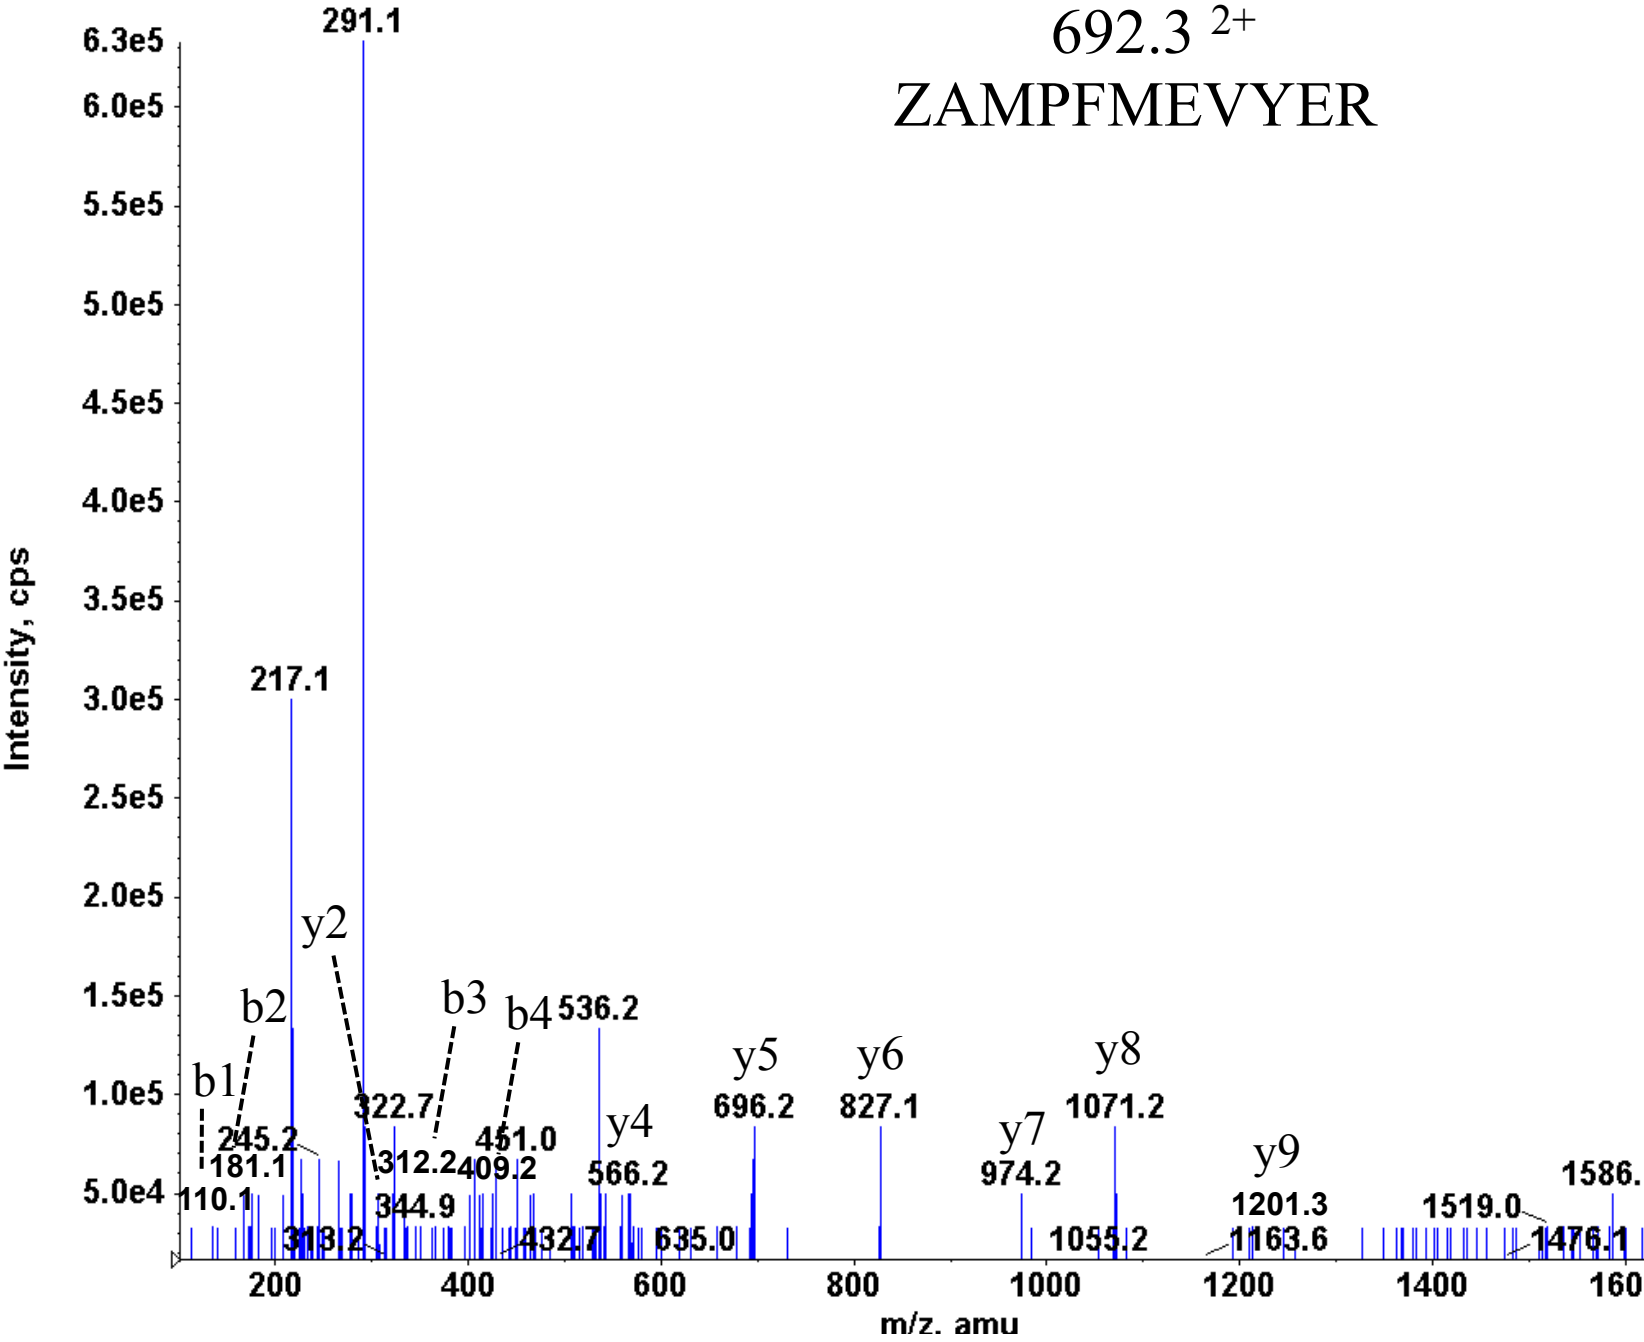

569.6<sup>2+</sup>  
SVDFDSESPR

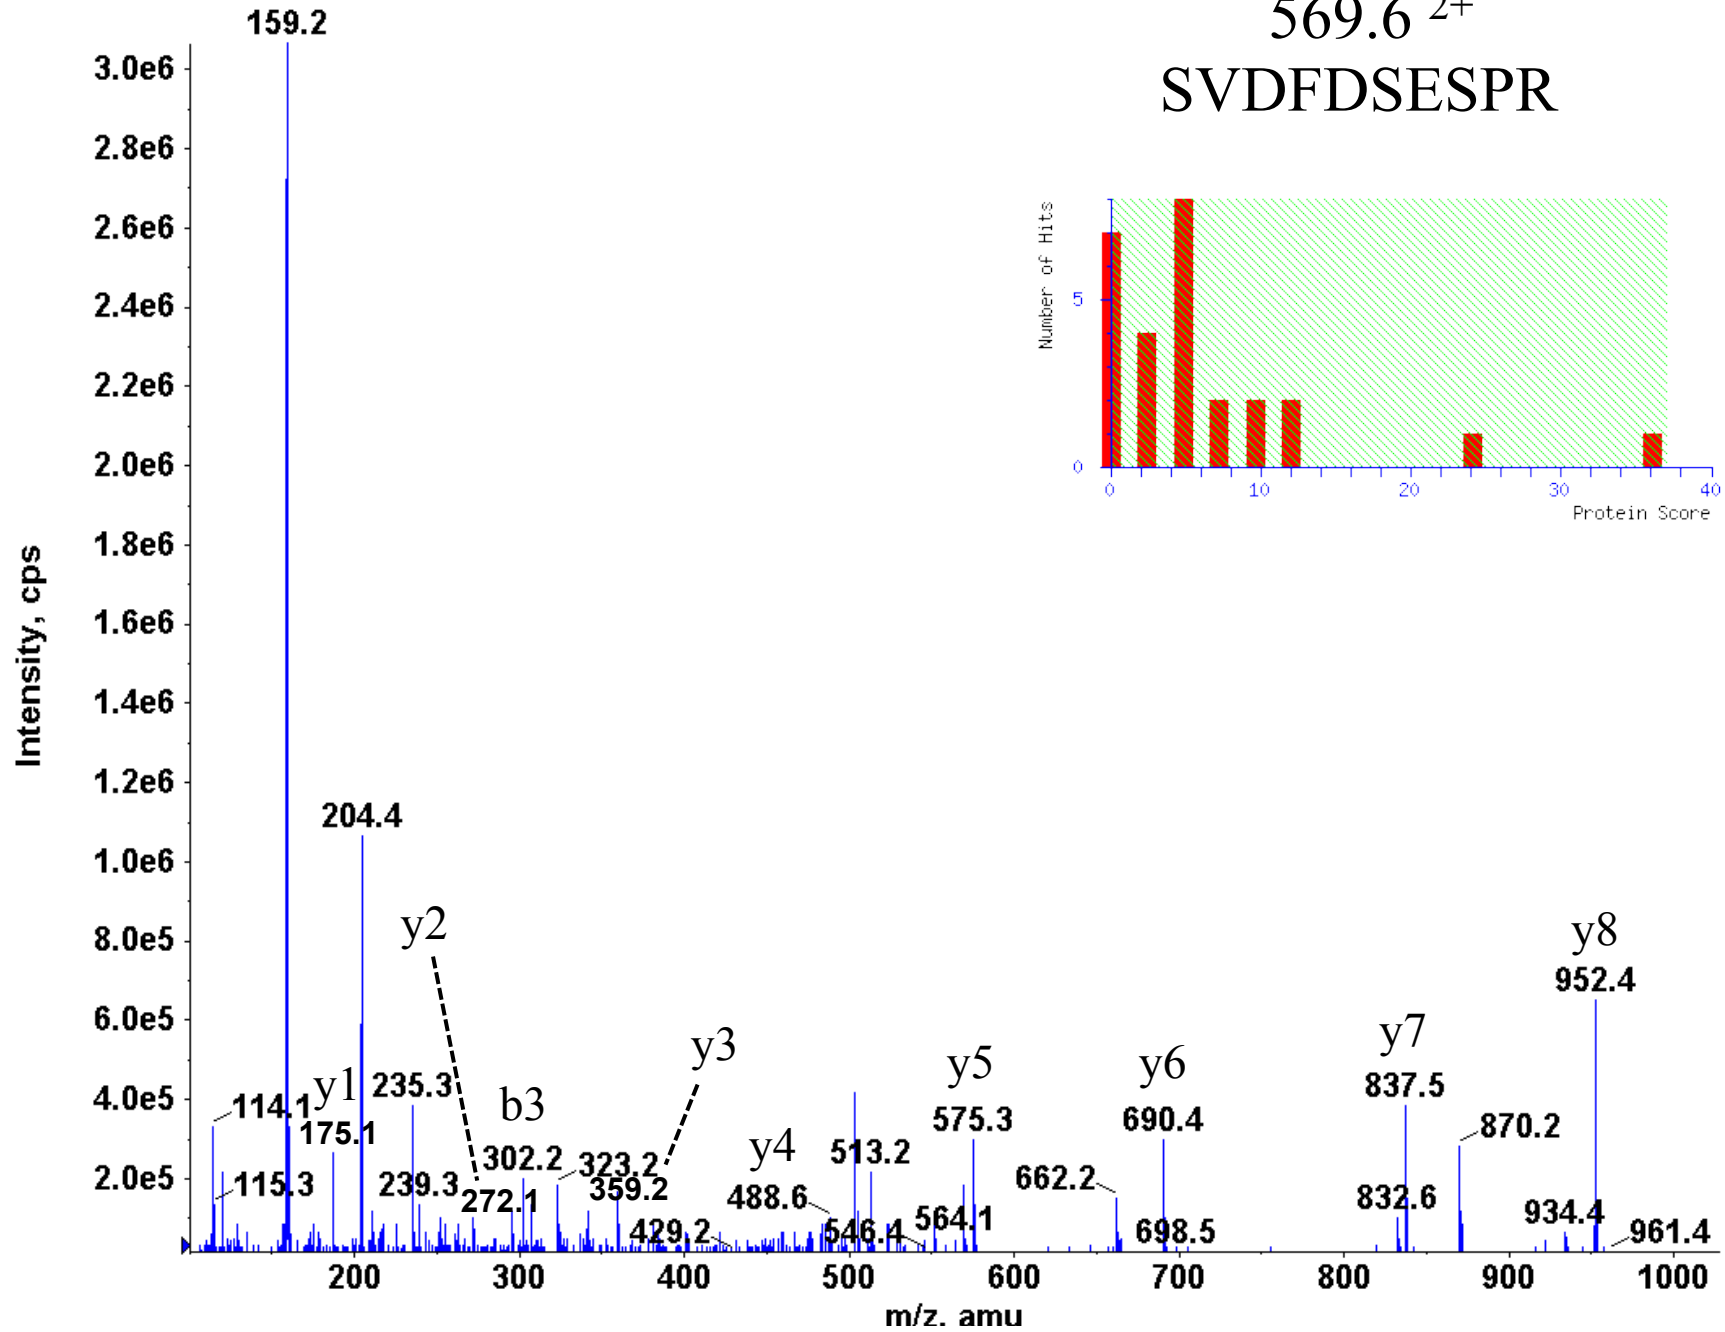

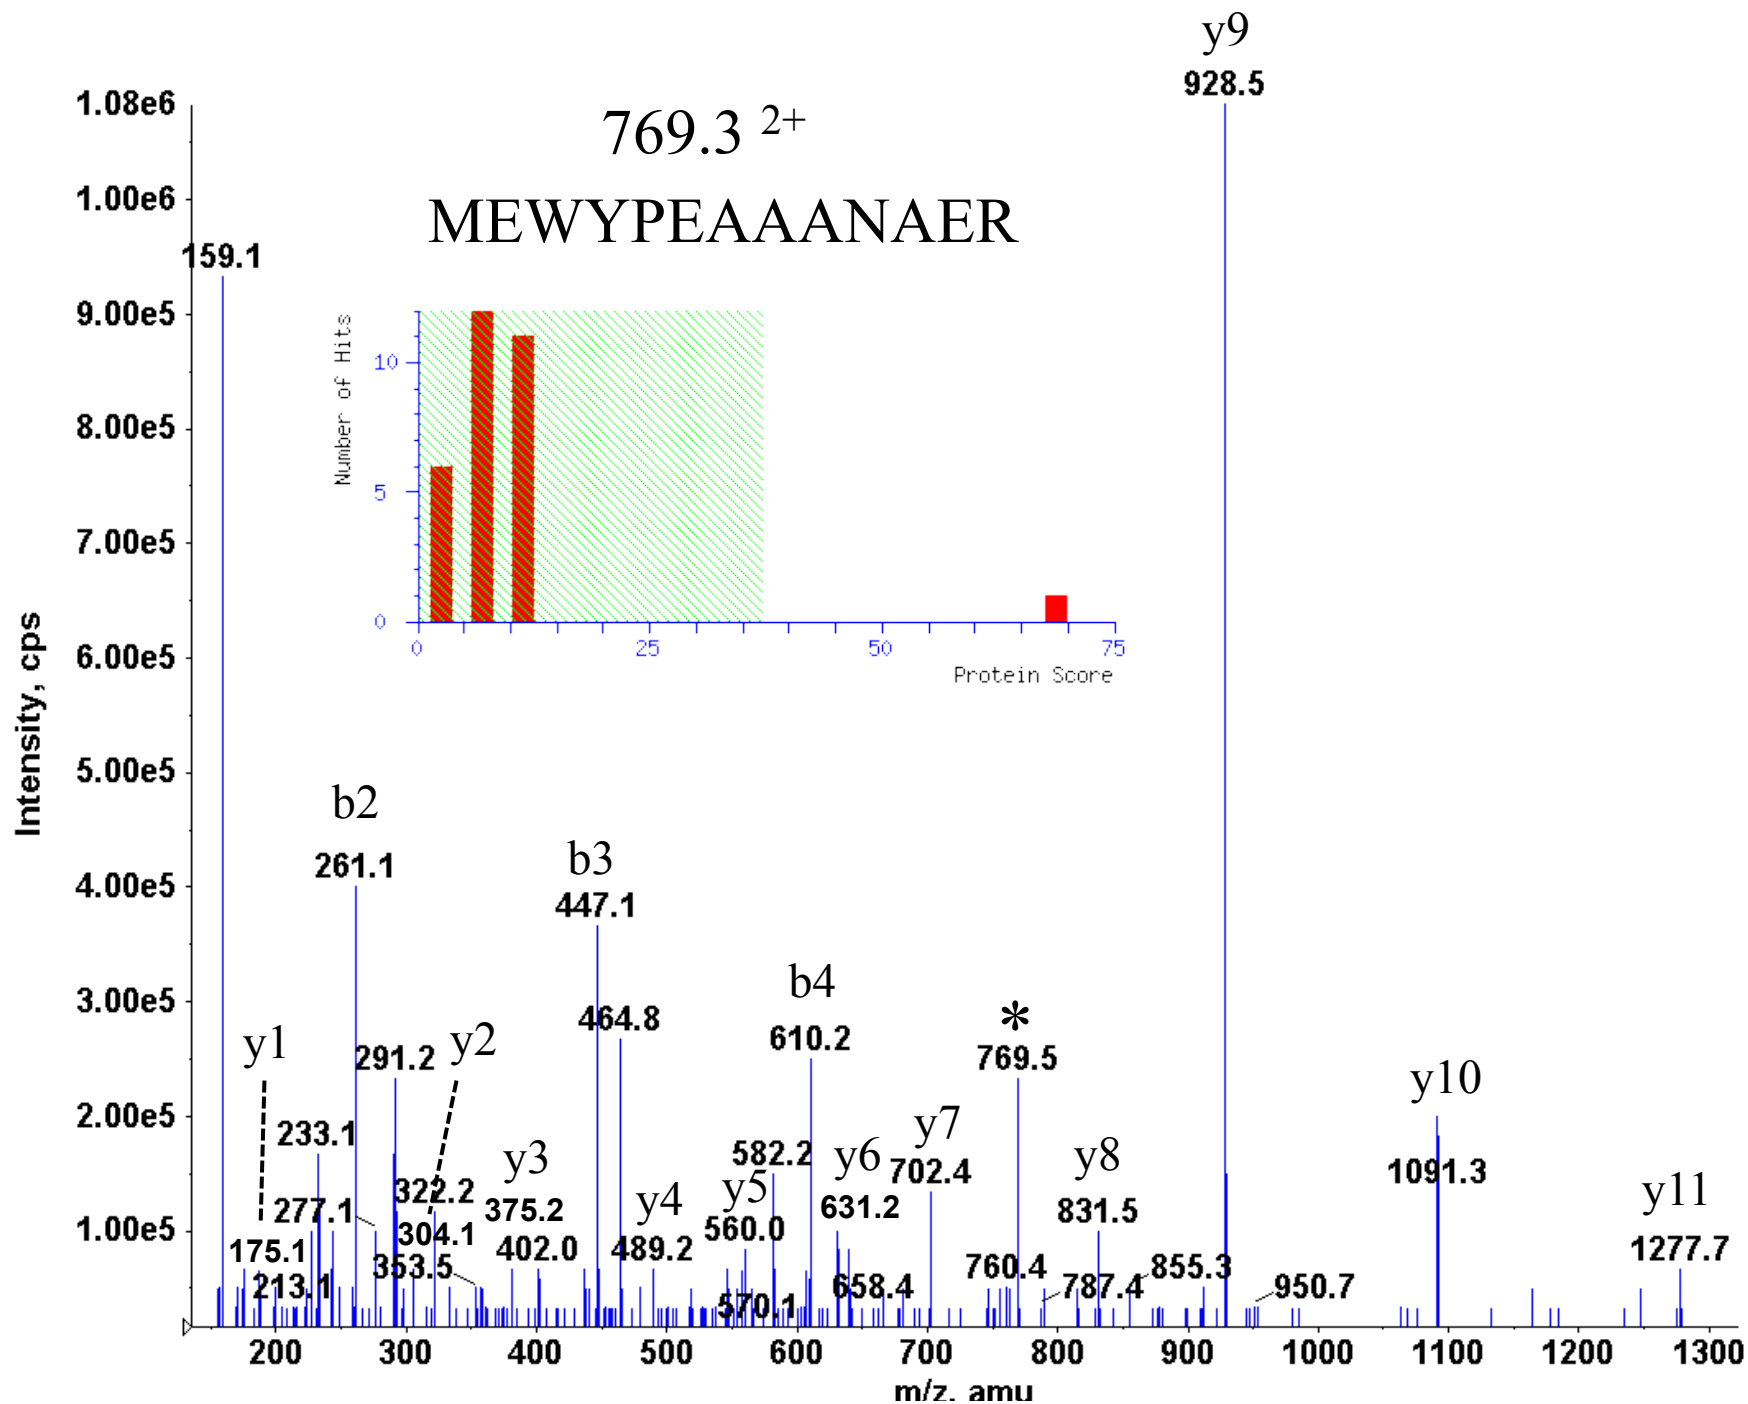

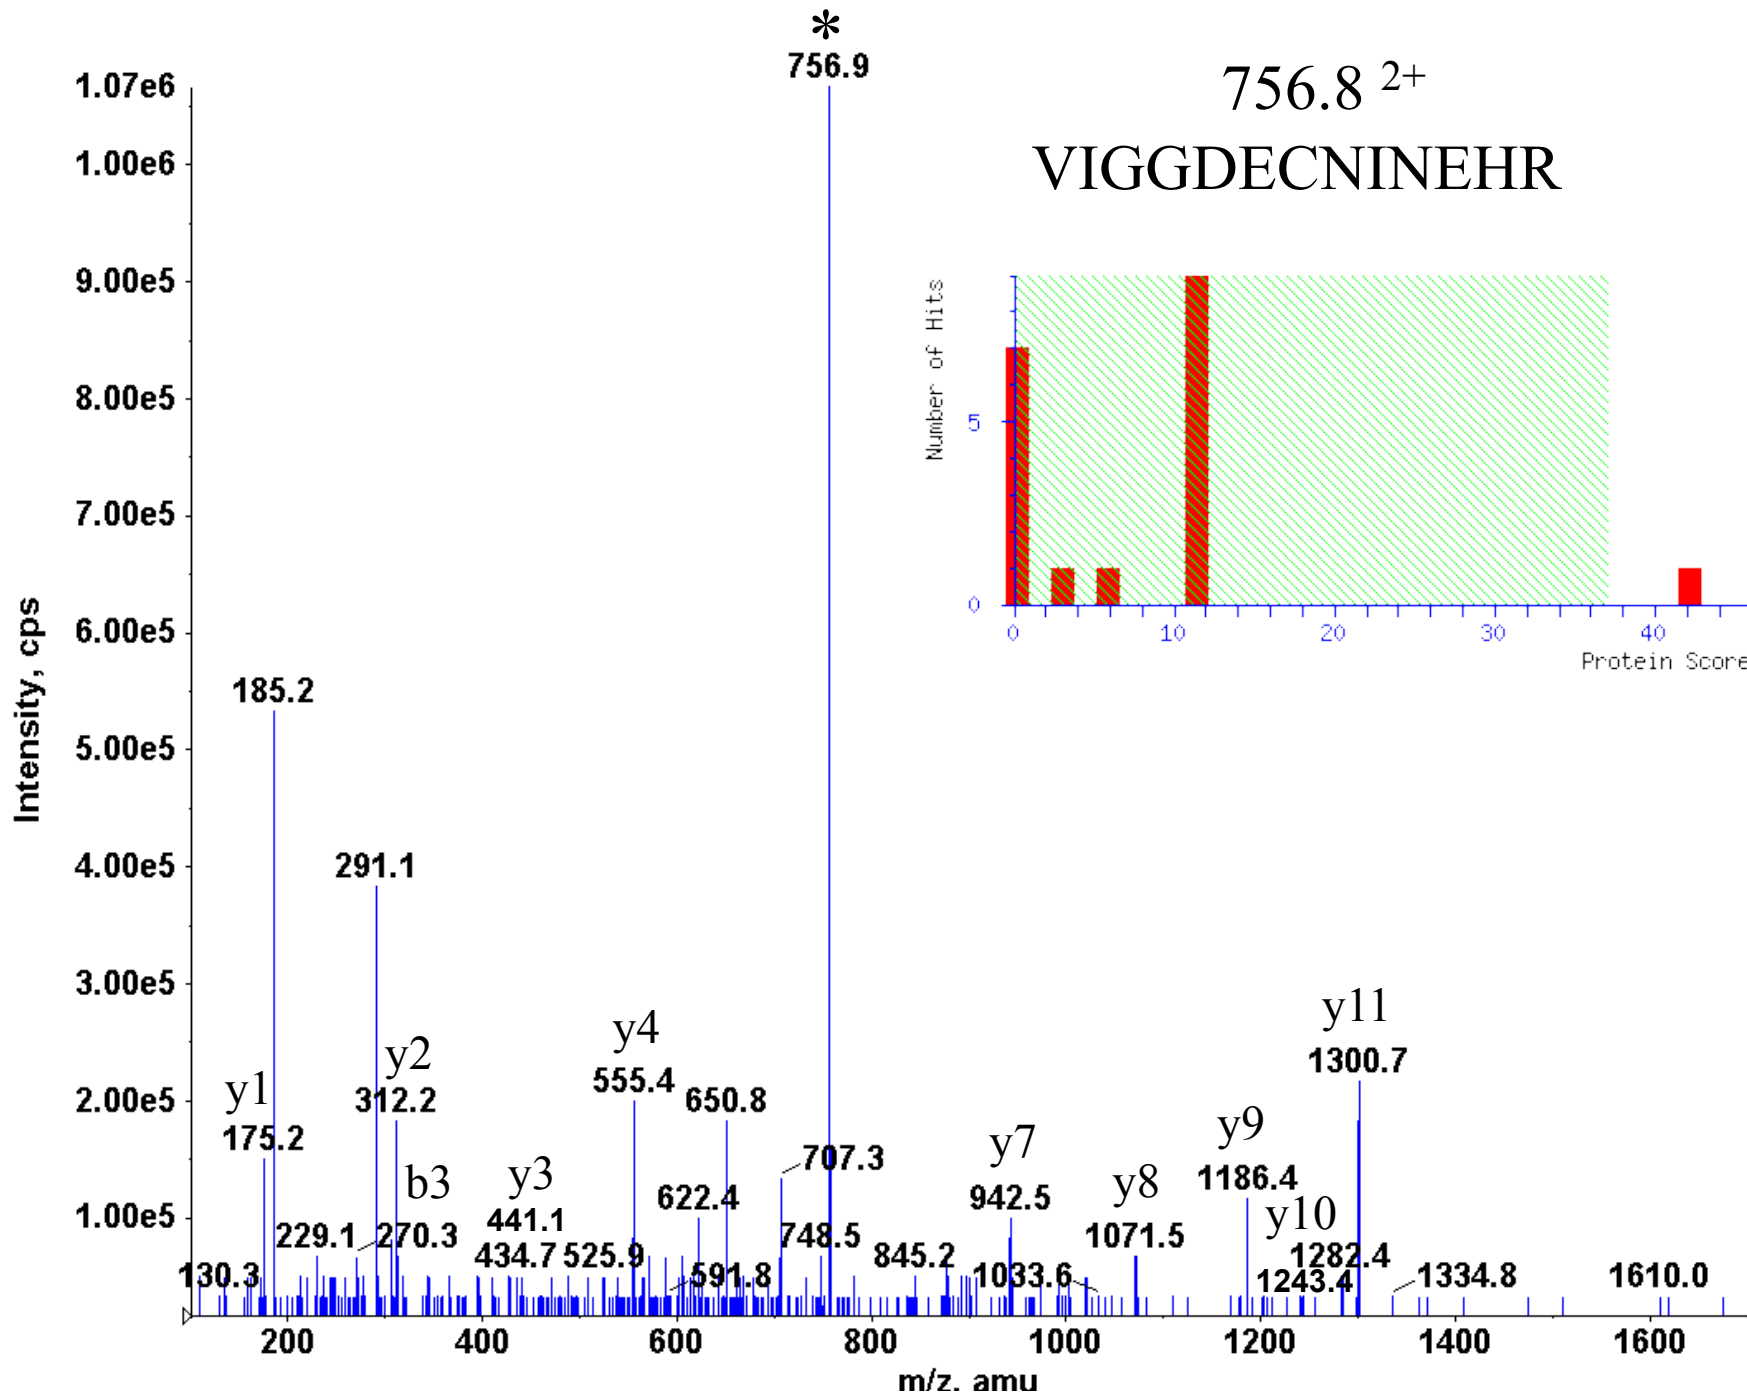

552.6<sup>2+</sup>  
TLCAGIVQGGK

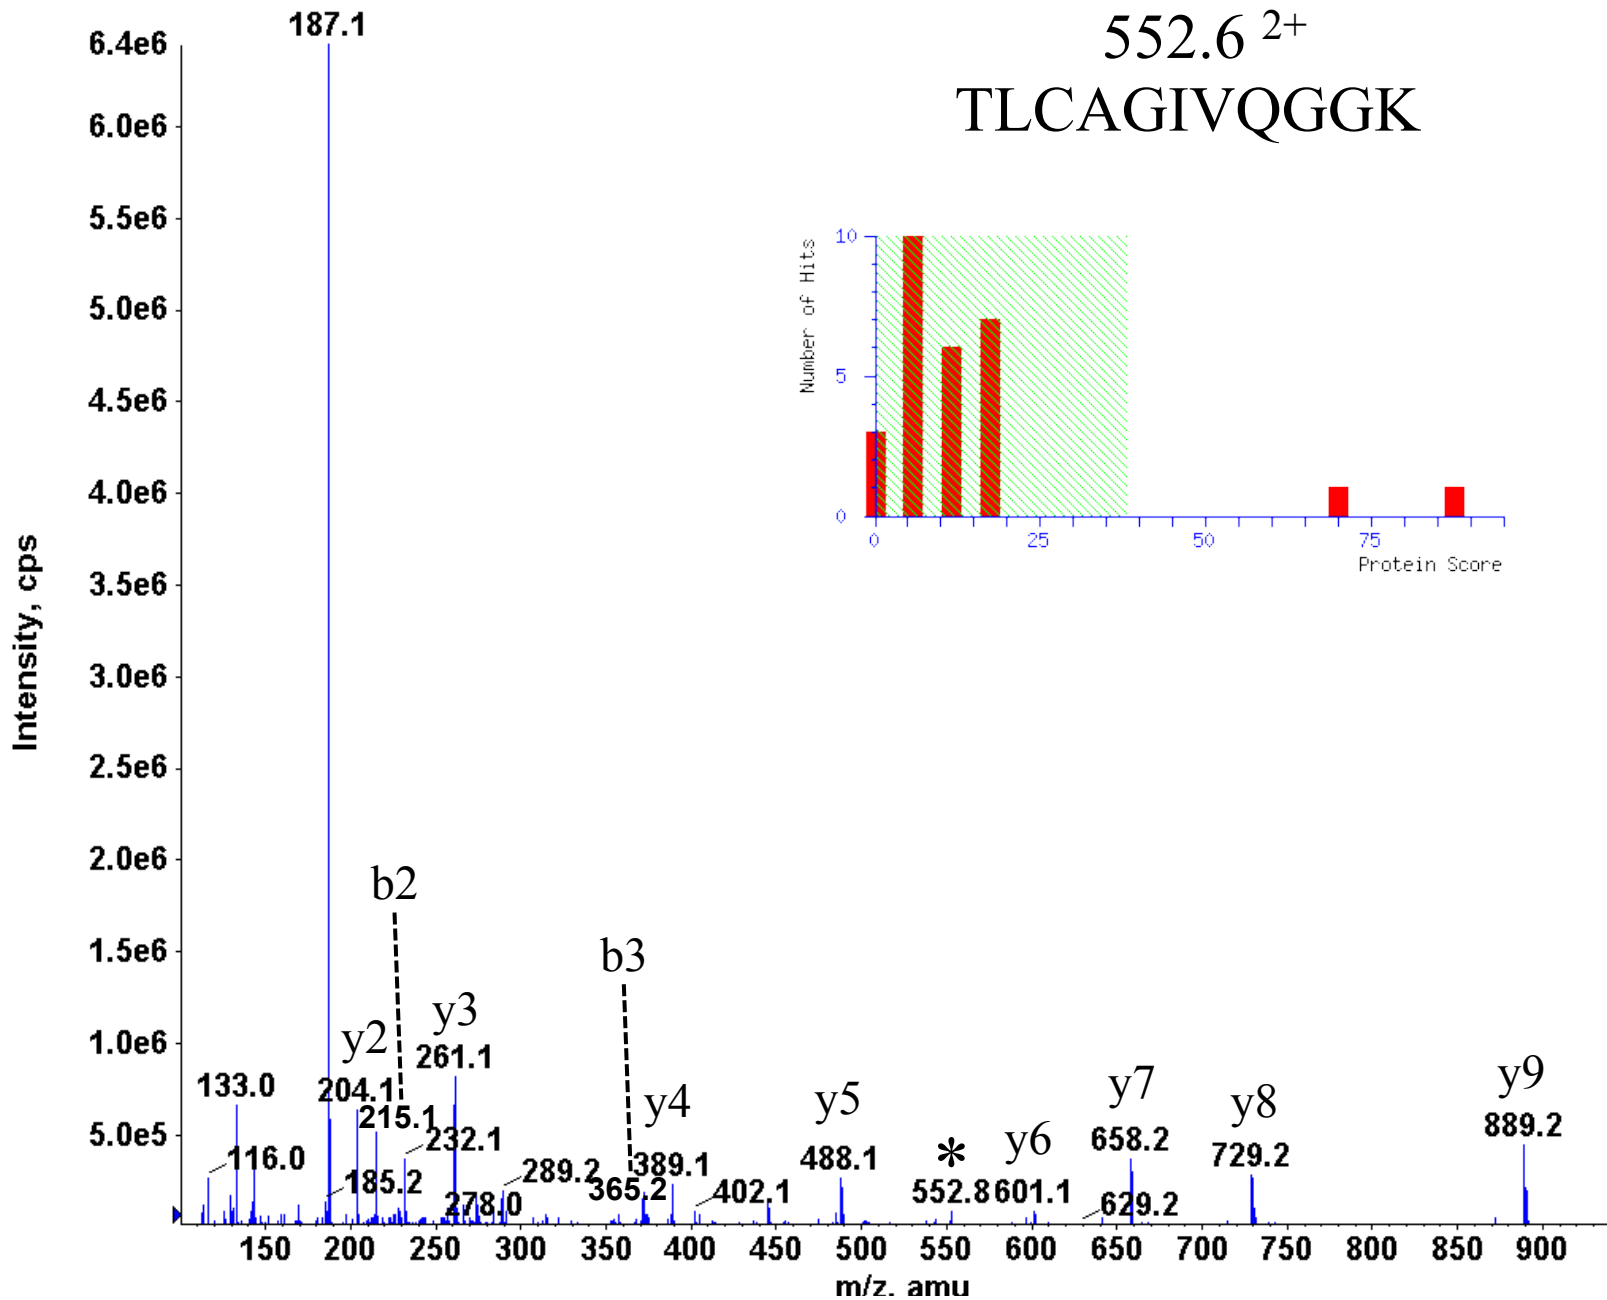

657.4<sup>2+</sup>  
XGNWGSXTPXTR

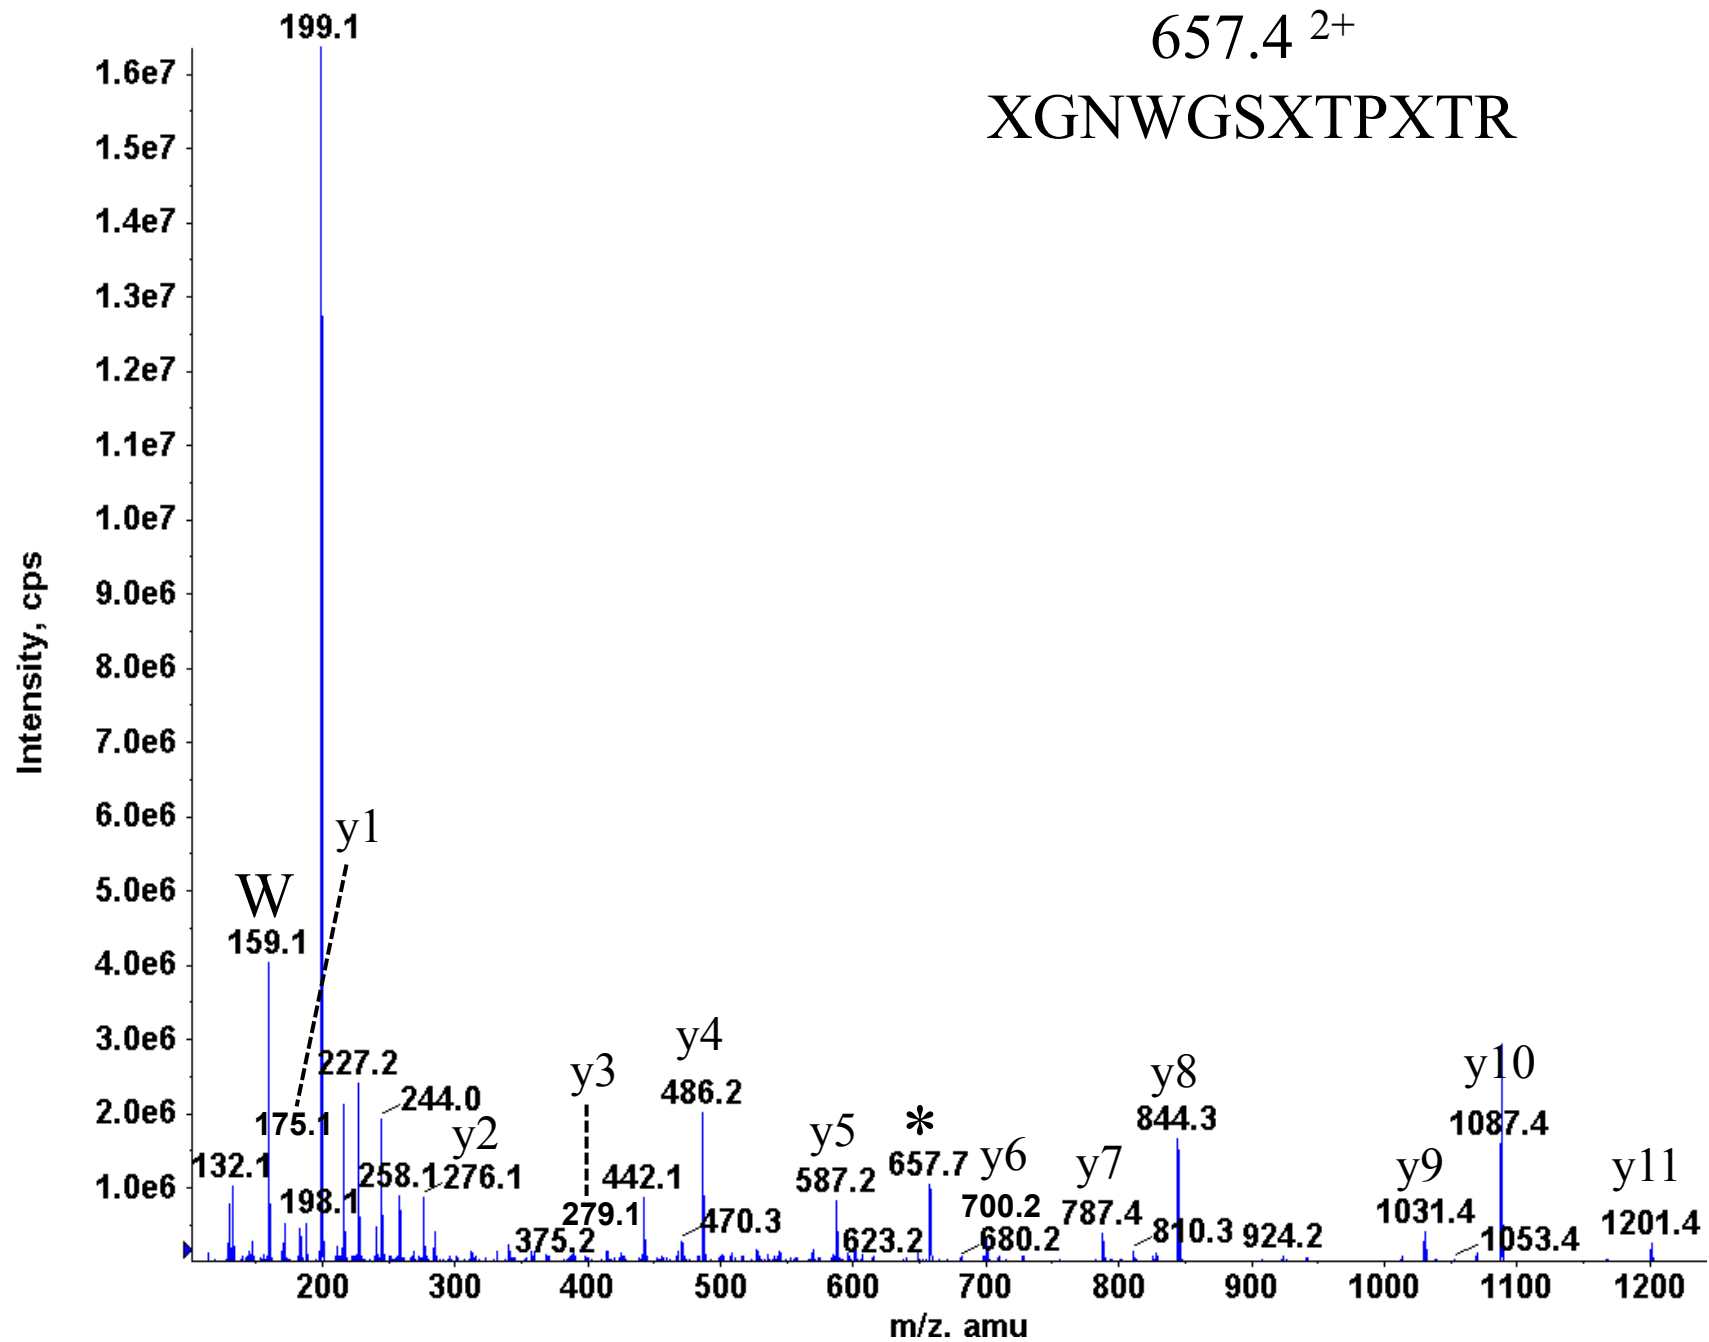



749.8 <sup>2+</sup>  
VVGDECDINEHR

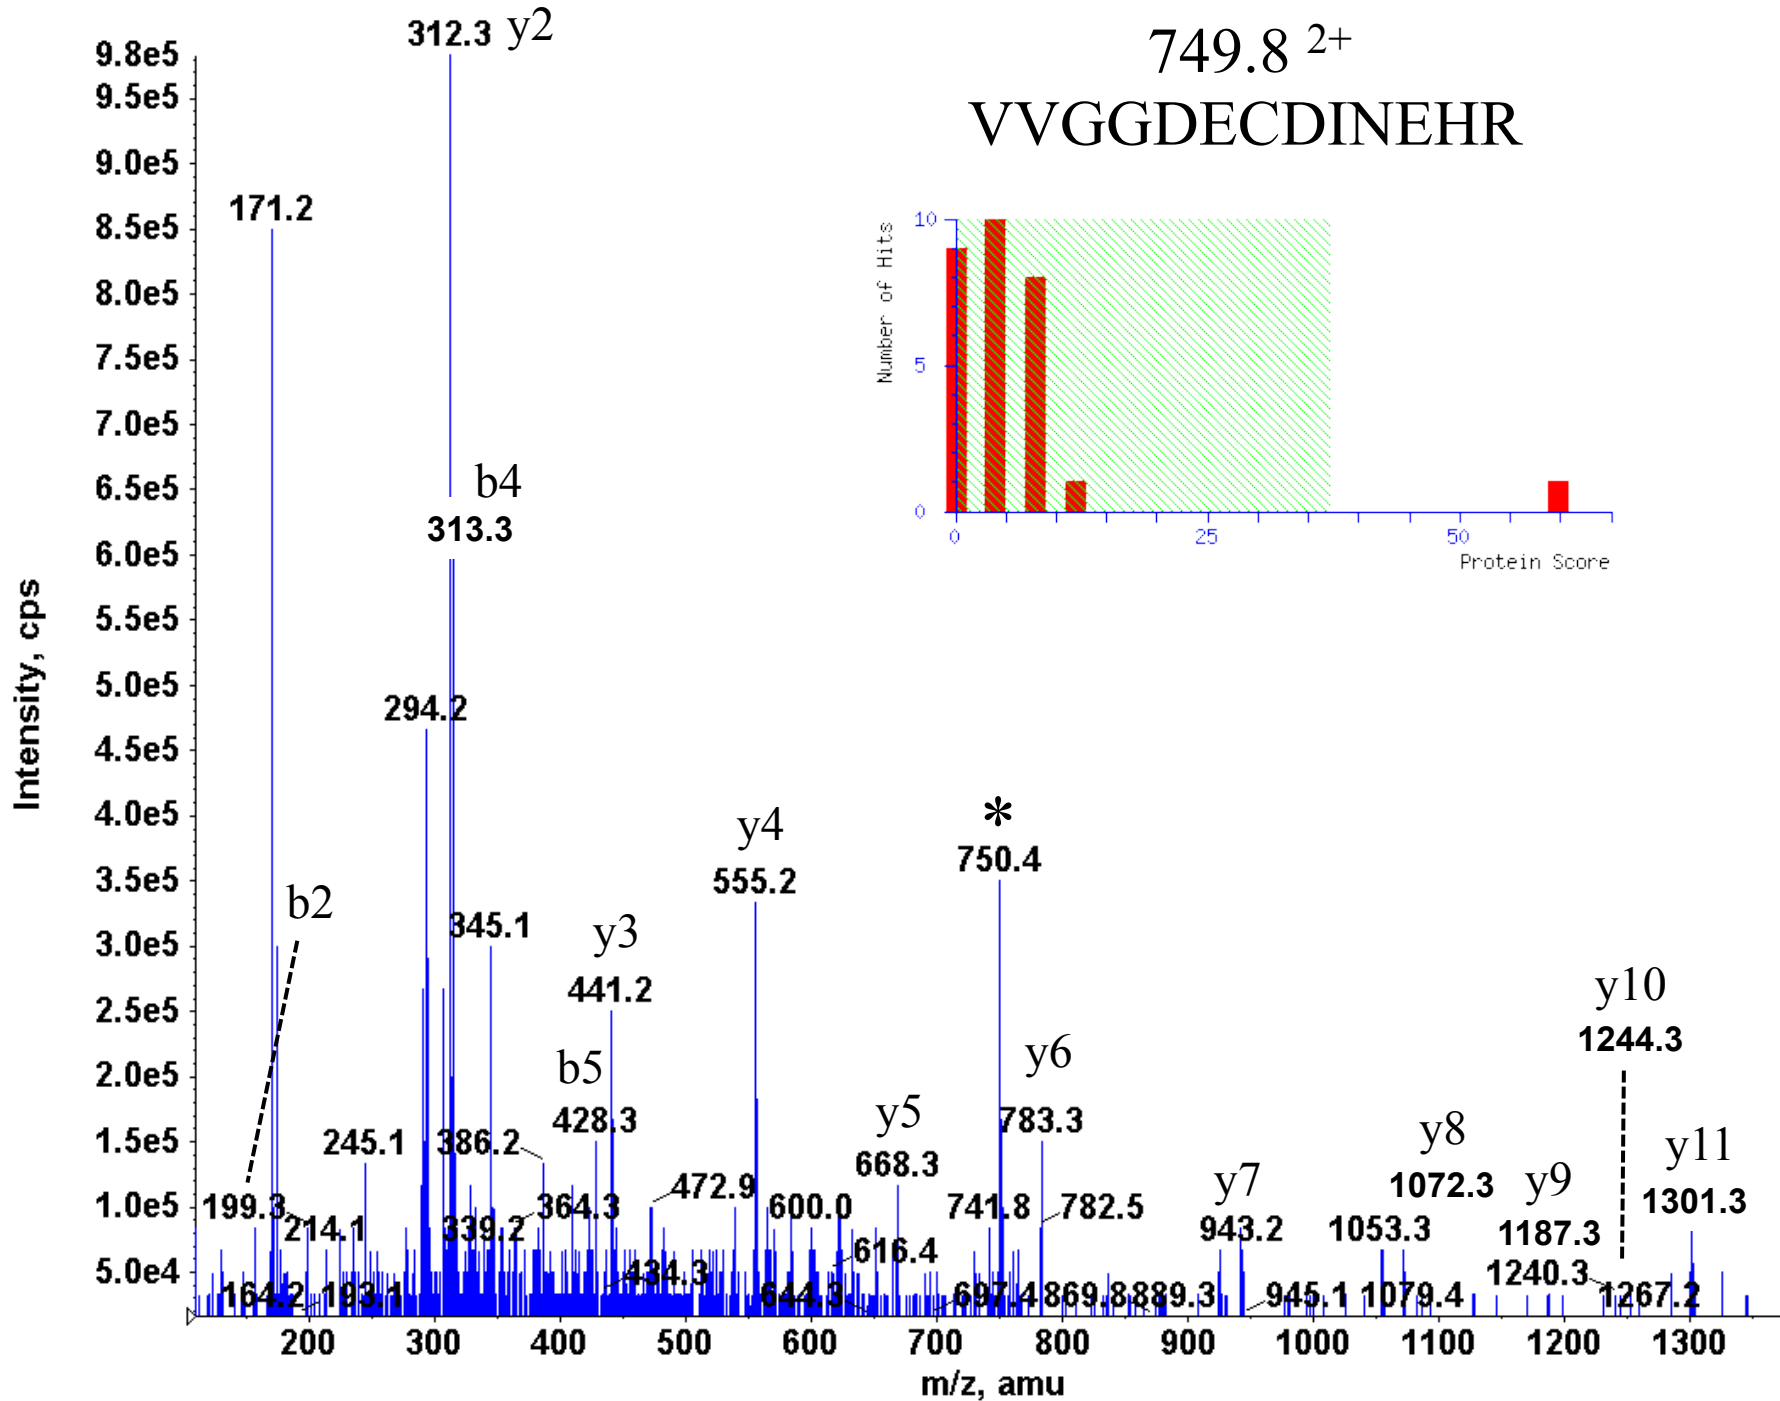

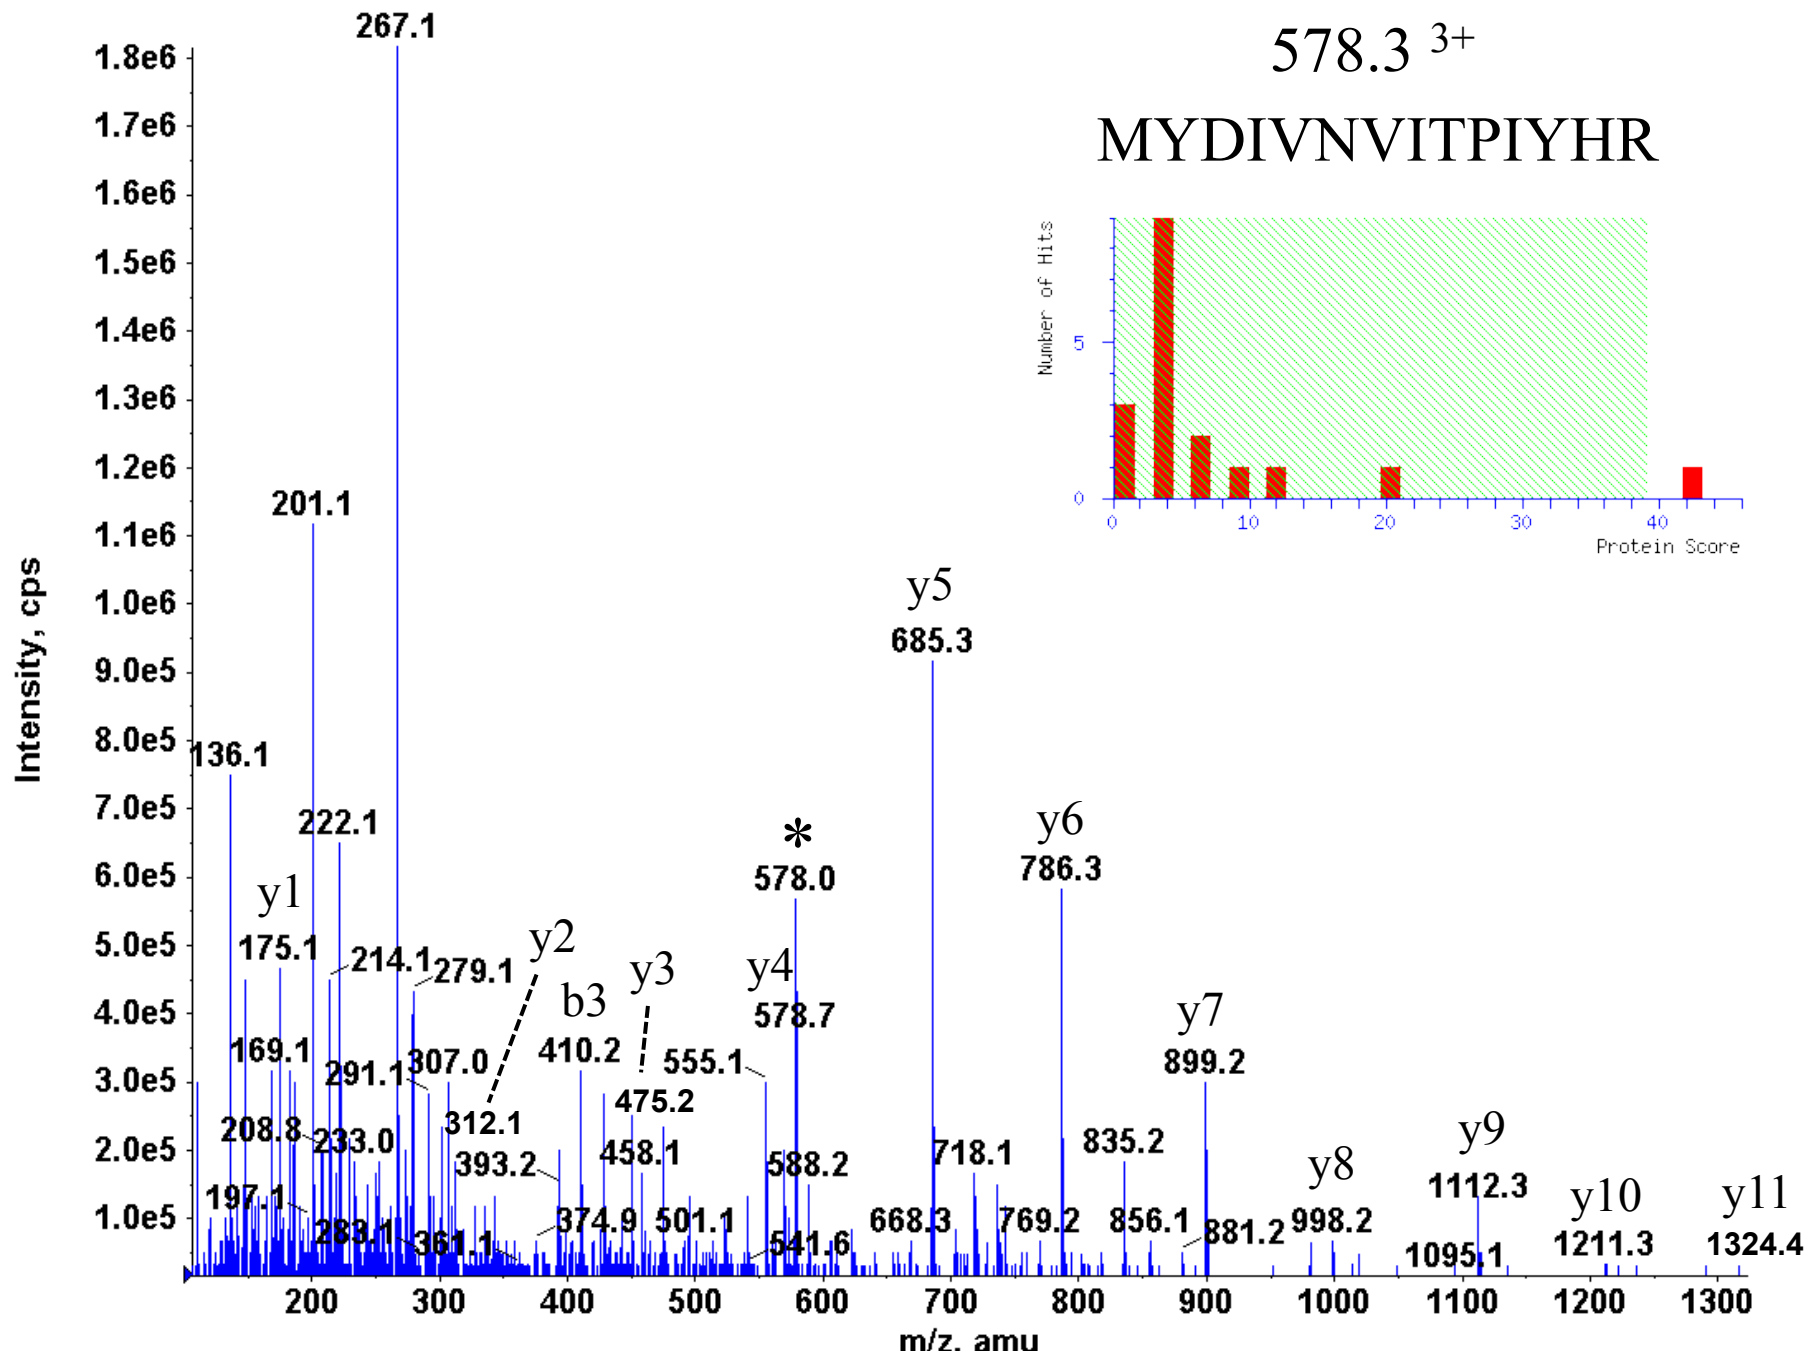

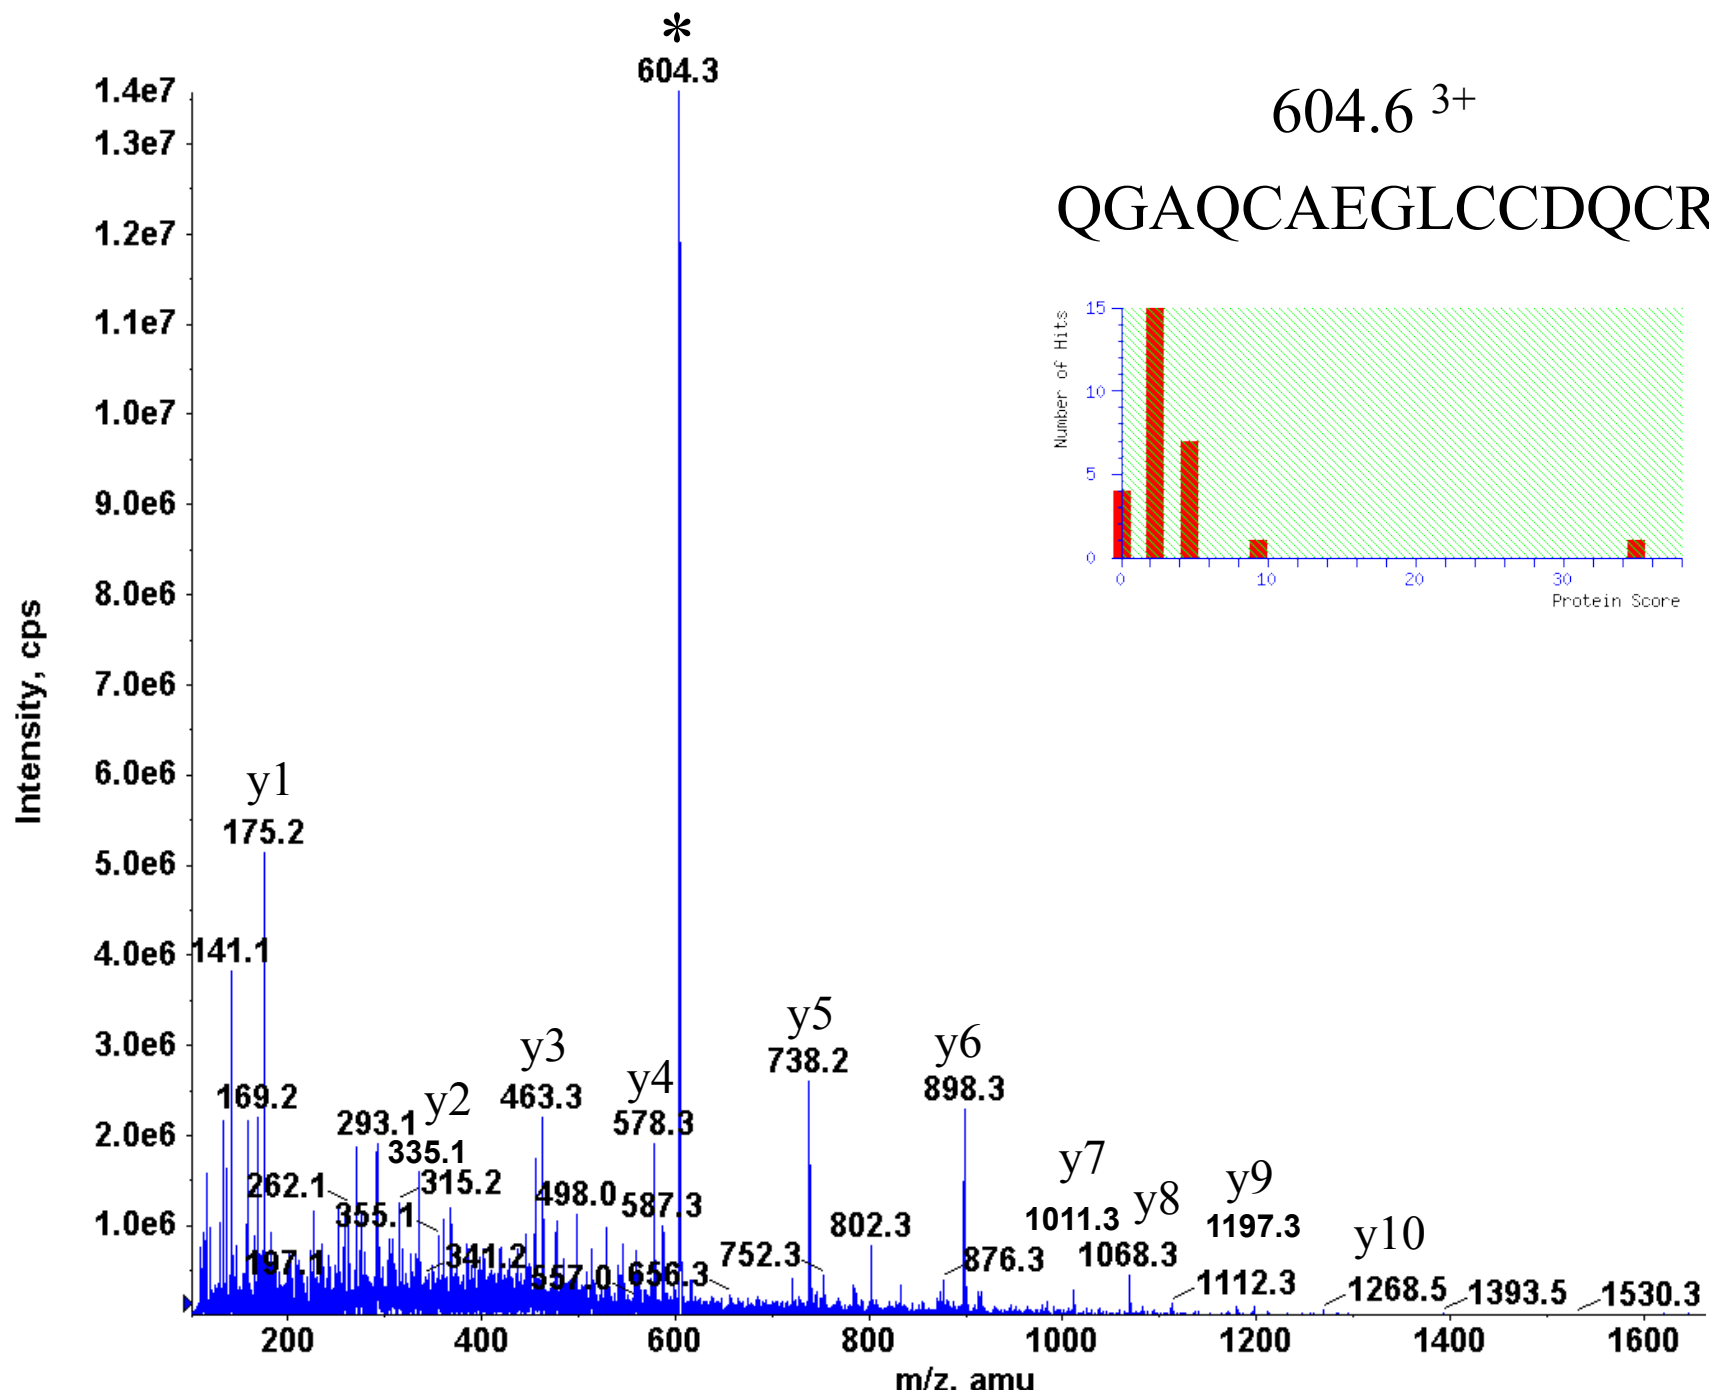

604.6<sup>3+</sup>  
QGAQCAEGLCCDQCR
